# Supplementary material
Source: PubMed Central journal article supplement (PMC5889106)
Supplement: NIHMS954528-supplement-Supplemental_Table_1.pdf [file NIHMS954528-supplement-Supplemental_Table_1.pdf]

**Supplemental Table 1.**

**Descriptive statistics, individuals recommended for sterilization (n=17,362)**

|                                               | Non-Spanish<br>surname (n=15,379) | Spanish surname<br>(n=1,983) | Total (n=17,362) |
|-----------------------------------------------|-----------------------------------|------------------------------|------------------|
|                                               | n (%)                             | n (%)                        | n (%)            |
| <b>Institution Type</b>                       |                                   |                              |                  |
| <i>Feeble-minded Homes</i>                    | 5129 (33.4)                       | 1014 (51.1)                  | 6143 (35.4)      |
| <i>Homes for the Mentally Ill</i>             | 10250 (66.6)                      | 969 (48.9)                   | 11219 (64.6)     |
| <b>Year recommended for<br/>sterilization</b> |                                   |                              |                  |
| 1920-1924                                     | 1804 (11.7)                       | 157 (7.9)                    | 1961 (11.3)      |
| 1925-1929                                     | 3073 (20.0)                       | 328 (16.5)                   | 3401 (19.6)      |
| 1930-1934                                     | 3143 (20.4)                       | 371 (18.7)                   | 3514 (20.2)      |
| 1935-1939                                     | 3837 (24.9)                       | 554 (27.9)                   | 4391 (25.3)      |
| 1940-1945                                     | 3522 (22.9)                       | 573 (28.9)                   | 4095 (23.6)      |
| <b>Gender</b>                                 |                                   |                              |                  |
| <i>Male</i>                                   | 7838 (51.0)                       | 984 (49.6)                   | 8822 (50.8)      |
| <i>Female</i>                                 | 7541 (49.0)                       | 999 (50.4)                   | 8540 (49.2)      |
| <b>Age</b>                                    |                                   |                              |                  |
| <15                                           | 639 (4.2)                         | 161 (8.1)                    | 800 (4.6)        |
| 15-19                                         | 3756 (24.4)                       | 763 (38.5)                   | 4519 (26.0)      |
| 20-24                                         | 2803 (18.2)                       | 333 (16.8)                   | 3136 (18.1)      |
| 25-29                                         | 2654 (17.3)                       | 275 (13.9)                   | 2929 (16.9)      |
| 30-34                                         | 2400 (15.6)                       | 215 (10.8)                   | 2615 (15.1)      |
| 35-39                                         | 1885 (12.3)                       | 156 (7.9)                    | 2041 (11.8)      |
| 40-44                                         | 824 (5.4)                         | 57 (2.9)                     | 881 (5.1)        |
| 45-49                                         | 301 (2.0)                         | 13 (0.7)                     | 314 (1.8)        |
| 50+                                           | 117 (0.8)                         | 10 (0.5)                     | 127 (0.7)        |
