# Supplementary material
Source: PubMed Central journal article supplement (PMC5889106)
Supplement: NIHMS954528-supplement-Supplemental_Table_2.pdf [file NIHMS954528-supplement-Supplemental_Table_2.pdf]

**Supplemental Table 2.**  
**Poisson Regression results, stratified on gender**

|                            | Male (n=8822)<br>IRR (95% CI) | Female (n=8540)<br>IRR (95% CI) |
|----------------------------|-------------------------------|---------------------------------|
| Spanish surname            |                               |                                 |
| <i>Non-Spanish surname</i> | (ref)                         | (ref)                           |
| <i>Spanish surname</i>     | 1.23 (1.15, 1.31)             | 1.59 (1.48, 1.70)               |
| Year                       |                               |                                 |
| 1920-1924                  | (ref)                         | (ref)                           |
| 1925-1929                  | 1.25 (1.16, 1.34)             | 1.79 (1.64, 1.96)               |
| 1930-1934                  | 0.95 (0.88, 1.02)             | 1.77 (1.62, 1.93)               |
| 1935-1939                  | 1.01 (0.94, 1.08)             | 1.80 (1.65, 1.96)               |
| 1940-1945                  | 0.63 (0.59, 0.68)             | 1.43 (1.31, 1.56)               |
| Age                        |                               |                                 |
| <15                        | (ref)                         | (ref)                           |
| 15-19                      | 3.66 (3.29, 4.08)             | 3.20 (2.88, 3.57)               |
| 20-24                      | 1.60 (1.42, 1.80)             | 1.71 (1.53, 1.92)               |
| 25-29                      | 0.90 (0.80, 1.02)             | 1.13 (1.00, 1.27)               |
| 30-34                      | 0.58 (0.51, 0.66)             | 0.77 (0.68, 0.87)               |
| 35-39                      | 0.41 (0.39, 0.46)             | 0.39 (0.35, 0.45)               |
| 40-44                      | 0.23 (0.20, 0.26)             | 0.09 (0.08, 0.11)               |
| 45-49                      | 0.10 (0.08, 0.12)             | 0.01 (0.01, 0.01)               |
| 50+                        | 0.01 (0.01, 0.01)             | 0.00 (0.00, 0.00)               |
| Institution random effect  | 0.55 (0.23, 1.29)             | 0.25 (0.10, 0.62)               |
